# Supplementary material for: Self-actuated microfluidic chiplet for two-stage multiplex nucleic acid amplification assay
Source: Royal Society of Chemistry journal article supplement (doi:10.1039/d4lc00752b), 2024-01-01
Supplement: d4lc00752b2.pdf [file d4lc00752b2.pdf]

## Self-Actuated Microfluidic Chiplet for Two-Stage Multiplex Nucleic Acid Amplification Assay

### Supplemental Information

Felix Ansah <sup>a,b</sup>, Marziyeh Hajialyani <sup>a</sup>, Fatemeh Ahmadi <sup>a</sup>, Yuming Gu <sup>a</sup>, Ergün Alperay Tarım <sup>a</sup>, Michael Mauk <sup>a</sup>, Gordon A. Awandare <sup>b</sup>, and Haim H. Bau <sup>a,\*</sup>

<sup>a</sup> Department of Mechanical Engineering and Applied Mechanics, University of Pennsylvania, Philadelphia, Pennsylvania 19104, United States.

<sup>b</sup> West African Centre for Cell Biology of Infectious Pathogens (WACCBIP), College of Basic and Applied Sciences, University of Ghana, Legon, Ghana.

\* Corresponding author: Department of Mechanical Engineering and Applied Mechanics, University of Pennsylvania, 233 Towne Building, Philadelphia, PA 19104. Fax +215-573-6334; e-mail: bau@seas.upenn.edu.

### List of Sections, Tables, and Figures

|                                                                                                                                                     |    |
|-----------------------------------------------------------------------------------------------------------------------------------------------------|----|
| <b>Videos</b> .....                                                                                                                                 | 2  |
| <i>Video S1: Penn RAMP Chiplet Operation.</i> .....                                                                                                 | 2  |
| <i>Video S2: Chiplet Self-aliquoting.</i> .....                                                                                                     | 2  |
| <b>SECTION S1: PRIMERS SEQUENCES AND AMPLIFICATION DATA</b> .....                                                                                   | 3  |
| <i>Table S1: The sequences of the primers used in this study</i> .....                                                                              | 3  |
| <i>Table S2: The sequence of gBlock gene fragments</i> .....                                                                                        | 4  |
| <i>Table S3: The threshold times (min) for benchtop LAMP, benchtop Penn-RAMP, and Penn-RAMP chiplet</i> .....                                       | 5  |
| <b>SECTION S2: CHIPLET AND PROCESSOR</b> .....                                                                                                      | 6  |
| <i>Fig. S1: The 3D - printed chiplet and incubator for the Penn-RAMP assay.</i> .....                                                               | 6  |
| <b>SECTION S3: FLOW DISTRIBUTION AND CONTROL</b> .....                                                                                              | 7  |
| <i>Fig. S2: Vertical cross-section of the chiplet.</i> .....                                                                                        | 7  |
| <i>Fig. S3: Time as a function of the liquid front's position during self-aliquoting</i> .....                                                      | 9  |
| <i>Fig. S4: Capillarity valve bridging pressure.</i> .....                                                                                          | 10 |
| <i>Fig. S5: The wettability of the chiplet material</i> .....                                                                                       | 11 |
| <b>SECTION S4: TEMPERATURE DISTRIBUTION</b> .....                                                                                                   | 12 |
| <i>Fig. S6: The temperature of the thin film heater, RPA chamber (inlet), LAMP chamber, and the chiplet's distal end as functions of time</i> ..... | 12 |

*Fig. S7: Volume of RPA reaction mix added and recovered before and after 10 min incubation at at 38°C..... 13*

**SECTION S5: AMPLIFICATION CURVES..... 14**

*Fig. S8: Amplification curves for chiplet-based Penn-RAMP assay for tomato viruses. .... 14*

**Videos**

**Video S1: Penn RAMP Chiplet Operation.** This video describes the chiplet’s sequence of operations. The video was recorded with a Google Pixel 7 smartphone camera at 60 fps and abbreviated for length.

**Video S2: Chiplet Self-aliquoting.** This video focuses on the reaction chambers’ filling (slowed by a factor of 10). The video was edited using the Microsoft Clipchamp application.

## SECTION S1: PRIMERS SEQUENCE AND AMPLIFICATION DATA

**Table S1:** The sequences of the primers used in this study

| Target                  | Primer | Sequence                                     |
|-------------------------|--------|----------------------------------------------|
| <b>ToBRFV</b>           | F3     | GTGGTTTTAAGGTGTATAGGTAC                      |
|                         | B3     | CTTCAAATGTGCTCTGATTG                         |
|                         | LF     | GAAAGCTCCTAACAAAGCAGTAACT                    |
|                         | LB     | ATGACGCAACGGTGGCTAT                          |
|                         | FIP    | TCGACTTCTATAATCCTAT-AATGCGGTACTAGATCCTC      |
|                         | BIP    | CGACAACCGCCGAAACGTTA-CAAACCTGTTCCCTTGAC      |
| <b>TMV</b>              | F3     | GAGTGGAAGTTCCTGAC                            |
|                         | B3     | ACAAACTCCAGAGAAAGCG                          |
|                         | LF     | CTCGTCGGCTCTTCCAT                            |
|                         | LB     | GCTATAACCACCCAGGACG                          |
|                         | FIP    | GCTGCTGTGTAGTAAGATCCGAGTGTGTCTGGTGGACAAA     |
|                         | BIP    | TTTCAGTTCAAGGTCGTTCCCAACTAAAAGTTCAGACGTT     |
| <b>Tomato<br/>(Cox)</b> | F3     | TATGGGAGCCGTTTTTGC                           |
|                         | B3     | AACTGCTAAGRGCATTCC                           |
|                         | LF     | ATGTCCGACCAAAGATTTTACC                       |
|                         | LB     | GTATGCCACGTCGCATTCC                          |
|                         | FIP    | ATGGATTTGRCCTAAAGTTTCAGGGCAGGATTTCACTATTGGGT |
|                         | BIP    | TGCATTTCTTAGGGCTTTCGGATCCRGCGTAAGCATCTG      |

The 1<sup>st</sup> stage RPA reaction of the Penn-RAMP assay uses the F3 and B3 outer primers, while the 2<sup>nd</sup> stage LAMP reaction uses F3, B3, LF, LB, FIB, and BIP primers.

**Table S2:** The sequence of gBlock gene fragments

| gBlock*                | Sequence                                                                                                                                                                                                                                                                                                                                                                                                                                                                                                                                                                                                                                                                                                                                                                                                                                                                                                                                                        |
|------------------------|-----------------------------------------------------------------------------------------------------------------------------------------------------------------------------------------------------------------------------------------------------------------------------------------------------------------------------------------------------------------------------------------------------------------------------------------------------------------------------------------------------------------------------------------------------------------------------------------------------------------------------------------------------------------------------------------------------------------------------------------------------------------------------------------------------------------------------------------------------------------------------------------------------------------------------------------------------------------|
| ToBRFV_KT383474_gBlock | TAATACGACTCACTATAGATGTCTTACACAATCGCAACTCC<br>ATCGCAATTTGTGTTTTTGTTCATCAGCATGGGCCGACCCT<br>ATAGAATTAATAAATTTATGTACTAATTCAGTGGTAATCA<br>GTTCCAAACACAACAAGCTAGAACAACCGTTCAACGGCAA<br>TTTAGCGAAGTGTGGAAACCTGTCCCTCAAGTCACTGTTA<br>GGTTTCCTGACAGTGGTTTTAAGGTGTATAGGTACAATG<br><b>CGTACTAGATCCTCTAGTACTGCTTTGTTAGGAGCTTT</b><br><b>CGATACTAGAAATAGGATTATAGAAGTCGAAAATCAGGC</b><br><b>GAACCCGACAACCGCCGAAACGTTAGACGCTACTCGTA</b><br><b>GAGTAGATGACGCAACGGTGGCTATAAGGAGCGCTATA</b><br><b>AATAATTTAGTAGTAGAATTGGTCAAAGGAACAGGTTTG</b><br><b>TACAATCAGAGCACATTTGAAAGTGCATCCGGTTTACAAT</b><br>GGTCTCTGCACCTGCATCTTGA                                                                                                                                                                                                                                                                                                                                                       |
| TMV_Tor2-L3 gBlock     | TAATACGACTCACTATAGTTGCGGAAGATATGTAATACATC<br>ACGACAGAGGATGCATTGTGTATTACGATCCCCTAAAGTT<br>GATCTCGAACTTGGTGCTAAACACATCAAGGATTGGGAA<br>CACTTGGAGGAGTTCAGAAGGTCTCTTTGTGATGTTGCTG<br>TTTTCGTTGAACAATTGTGCGTATTACACACAGTTGGACGA<br>CGCTGTATGGGAGGTTTCATAAGACCGCCCTCCAGGTTT<br>GTTTGTATAAAAAGTCTGGTGAAGTATTTGTCTGATAAAG<br>TTCTTTTATAAAGTTTGTATAGATGGCTCTAGTTGTTAA<br>AGGAAAAGTGAATATCAATGAGTTTATCGACCTGACAAAA<br>ATGGAGAAGATCTTACCGTCGATGTTTACCCCTGTAAAGA<br>GTGTTATGTGTTCCAAAGTTGATAAAATAATGGTTCATGAG<br>AATGAGTCATTGTCAGGGGTGAACCTTCTTAAAGGAGTTA<br>AGCTTATTGATAGTGGATACGTCTGTTTAGCCGGTTTGGT<br>CGTCACGGGCGAGTGGAACTTGCCTGACAATTGCAGAG<br><b>GAGGTGTGAGCGTGTGTCTGGTGGACAAAAGGATGGAA</b><br><b>AGAGCCGACGAGGCCACTCTCGGATCTTACTACACAGC</b><br><b>AGCTGCAAAGAAAAGATTTCAAGTTCGTTCCCAA</b><br><b>TTATGCTATAACCACCCAGGACGCGATGAAAAACGTCTG</b><br><b>GCAAGTTTTAGTTAATATTAGAAATGTGAAGATGTCAGC</b><br><b>GGGTTTCTGTCCGCTTTCTCTGGAGTTTGTGTCCGGTGTGT</b><br>ATTGTTTATAGAAATAAT |

\*gBlock gene fragments were used in the study as templates. The bold region represents the amplicon's sequence.

**Table S3:** The threshold times (min) for benchtop LAMP, benchtop Penn-RAMP, and Penn-RAMP chiplet

| Target virus  | gBlock Copies/reaction | Threshold time (min) <sup>#</sup> |               |              |
|---------------|------------------------|-----------------------------------|---------------|--------------|
|               |                        | Benchtop LAMP                     | Benchtop RAMP | Chiplet RAMP |
| <b>ToBRFV</b> | 5 x 10 <sup>8</sup>    | 8.5 ± 0.1                         | 5.3 ± 0.4     | 23.0 ± 0.0   |
|               | 5 x 10 <sup>6</sup>    | 11.1 ± 0.3                        | 6.6 ± 0.3     | 25.7 ± 0.6   |
|               | 5 x 10 <sup>4</sup>    | 13.3 ± 0.3                        | 6.6 ± 0.8     | 26.7 ± 0.6   |
|               | 5 x 10 <sup>2</sup>    | 14.5 ± 1.8                        | 7.7 ± 0.4     | 32.0 ± 1.7   |
|               | 5 x 10 <sup>1</sup>    | 17.3 ± 2.4                        | 7.9 ± 1.0     | 32.3 ± 0.6   |
|               | 5 x 10 <sup>0</sup>    | Negative                          | 9.1 ± 1.3     | 33.7 ± 0.6   |
| <b>TMV</b>    | 5 x 10 <sup>8</sup>    | 7.7 ± 0.7                         | 6.0 ± 0.1     | 27.3 ± 0.6   |
|               | 5 x 10 <sup>6</sup>    | 9.1 ± 0.1                         | 6.1 ± 0.5     | 30.3 ± 0.6   |
|               | 5 x 10 <sup>4</sup>    | 11.3 ± 0.8                        | 6.1 ± 0.2     | 31.3 ± 0.6   |
|               | 5 x 10 <sup>2</sup>    | 13.5 ± 0.1                        | 9.0 ± 0.5     | 34.0 ± 0.0   |
|               | 5 x 10 <sup>1</sup>    | 18.4 ± 2.3                        | 11.6 ± 1.6    | 34.3 ± 1.2   |
|               | 5 x 10 <sup>0</sup>    | Negative                          | 17.2 ± 0.7    | 36.7 ± 0.6   |

<sup>#</sup> The average threshold times (min) and the standard deviation for triplicate assays.

## SECTION S2: CHIPLLET AND PROCESSOR

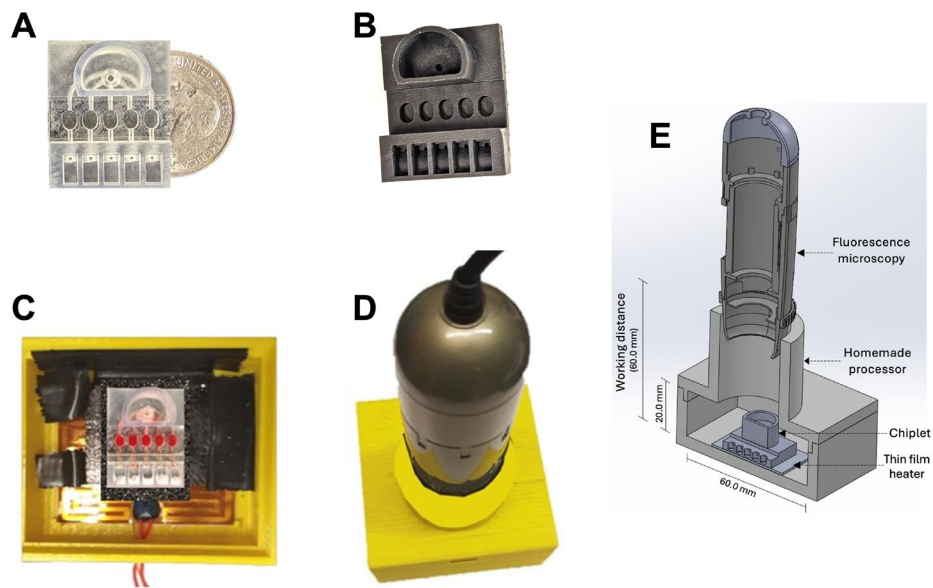

**Fig. S1:** The 3D - printed chiplet and incubator for the Penn-RAMP assay. **(A)** 3D - printed chiplet made with clear, transparent resin (Formlabs, RS-F2-GPCL-04) for flow visualization and flow-control optimization. A USA quarter dollar coin is included for scale. **(B)** Self-actuated chiplet printed with black resin (Formlabs, RS-F2-GPBK-04). This black chiplet was used for our Penn RAMP assay to minimize background fluorescence. **(C)** Penn-RAMP chiplet placed on a thin film heater with a thermal spreader. **(D)** Our homemade incubator houses a heater, a thermal control circuit board, and a USB fluorescence microscope for real-time image acquisition during Penn-RAMP incubation. **(E)** Cross-section (SOLIDWORKS) of the processor showing the working distance between the camera and the chiplet. Figure not drawn to scale.

### SECTION S3: FLOW DISTRIBUTION AND CONTROL

Once the PCM valve (component 7 in Fig. 2C) melts, the first-stage amplification products self-aliquot rapidly by the combined actions of gravity and capillary flow into the second-stage reaction chambers. To image this process, we used a transparent chiplet, phenol red solution [S1] mixed with detergent [S2], and a Google Pixel 7 smartphone camera at 60 frames per second (a video is included as a supplement). This section models this flow process with the Washburn equation [S3].<sup>1-3</sup>

Fig. S2 depicts a cross-section of our chiplet with one flow conduit and defines the geometric quantities used in our model.  $L_1$ ,  $L_2$ , and  $L_3$ , are, respectively, the lengths of the inlet conduit leading into the LAMP reaction chamber, the LAMP reaction chamber, and the

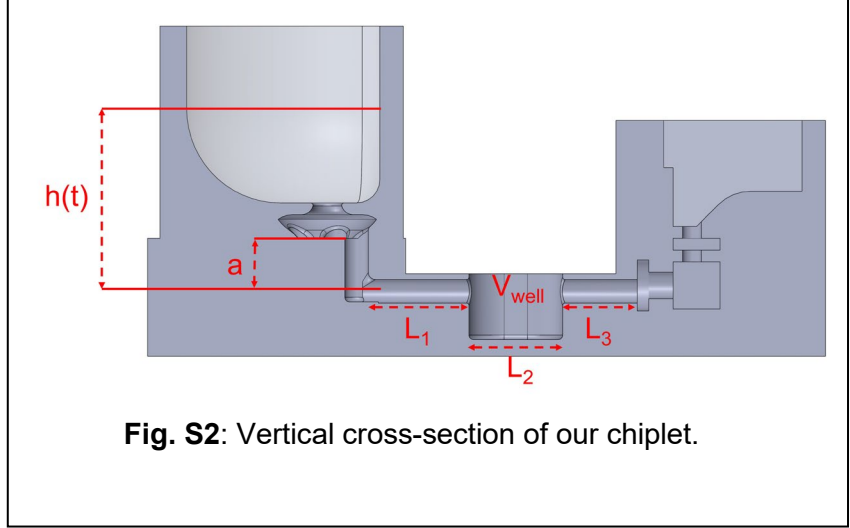

**Fig. S2:** Vertical cross-section of our chiplet.

exit conduit.  $h(t)$  is the instantaneous liquid level in the 1<sup>st</sup> stage reaction chamber,  $t$  is time, and  $(a)$  is the length of the vertical descender. We assume that the descender fills nearly instantaneously once the PCM valve melts. We model the process afterward. In section  $(0 < L < L_1)$ , we have the force balance:

$$\left( \rho g (h_{R_0} - 5 \frac{A_c}{A_R} L) + \frac{2 \gamma \cos \theta}{r} \right) A_c - 2 \pi r \tau_{contact} = 8 \mu \pi (L + a) \frac{dL}{dt}. \quad (0 < L < L_1) \quad (\text{E1})$$

In the above, the 1<sup>st</sup> term on the left is the instantaneous pressure head at the inlet, the second is the Laplace pressure deficit behind the advancing meniscus, and the third is contact line resistance. The term on the right is the viscous drag.  $\rho = 10^3 \text{ kg m}^{-3}$  is the liquid density,  $g$  is the gravitational acceleration,  $A_c$  is the cross-sectional area of the inlet conduit  $(0 < L < L_1)$  and the exit conduit,  $A_R$  is the average cross-sectional area of the 1<sup>st</sup> stage reaction chamber (approximated as uniform),  $\gamma \sim 30 \text{ mN m}^{-1}$  is the surface tension that accounts for the presence of detergent in the fluid,  $\theta \sim 47.6^\circ$  is the contact angle,  $r = 0.5 \text{ mm}$  is the conduit's radius.  $\tau_{contact} \sim 10^{-3} \text{ N m}^{-1}$  is the contact line resistance, and  $\mu \sim 6 \times 10^{-3} \text{ N m}^{-2} \text{ s}$  is the liquid viscosity (phenol red with detergent). The 1<sup>st</sup> stage products are aliquoted into 5 reaction chambers. Thus, the factor "5" in the 1<sup>st</sup> term on the left. Equation (E1) can be rewritten concisely as:

$$C_1 - C_2 L^* = L^* \frac{dL^*}{dt}, \quad (\text{E2})$$

where  $C_1 = \frac{1}{8\mu\pi} \left[ (A_c \rho g h_{R_0}) + \left( \frac{5A_c^2 \rho g}{A_R} a \right) + \left( A_c \frac{2\gamma \cos\theta}{r} \right) - 2\pi r \tau_{contact} \right]$ ,  $C_2 = \frac{5A_c^2 \rho g}{8\mu\pi A_R}$ , and  $L^* = L + a$ . We integrate equation (E2) with the initial condition  $L^*(0)=a$  to obtain the implicit relationship between the position ( $L$ ) of the advancing meniscus and time ( $t$ )

$$t = -\frac{1}{C_2^2} \left[ C_2 L + C_1 \ln \frac{C_1 - C_2(L+a)}{C_1 - C_2 a} \right] \quad (0 < L < L_1, \quad 0 < t < t_1) \quad (\text{E3})$$

When ( $L_1 < L < L_1 + L_2$ ), the fluid fills the LAMP reaction chamber. In this process, capillary and viscous effects in the LAMP chamber are neglected because of its relatively large cross-sectional area, and the flow is driven by gravity alone until the chamber fills. Equation (E1) reduces to

$$\rho g \left( h_{R_1} - 5 \frac{A_c}{A_R} \int_{t_1}^t u dt \right) A_c = 8\mu\pi(L_1 + a) u, \quad (\text{E4})$$

where  $u$  is the cross-section averaged fluid velocity.  $h_{R_1} = h_{R_0} - 5 \frac{A_c}{A_R} ((L_1 + a))$ ,  $\rho g A_c h_{R_1} = 8\mu\pi(L_1 + a) u(t_1)$ , and  $A_c \int_{t_1}^{t_2} u dt = V_{well}$ . Equation (E4) admits the solution

$$u(t) = \frac{(\rho g) A_c h_{R_1}}{8\mu\pi(L_1+a)} e^{-K(t-t_1)} \quad (t_1 < t < t_2), \quad (\text{E5})$$

where  $K = \frac{5 \rho g A_c^2}{8\mu\pi(L_1+a)A_R}$  and  $t_2 - t_1 = -\frac{1}{K} \ln \left( 1 - \frac{5 V_{well}}{A_R h_{R_1}} \right)$ .

The flow in the third conduit's segment is like in the first section (E1), accounting for the additional friction associated with the  $L_1$  segment.

$$\left( \rho g (h_{R_2} - 5 \frac{A_c}{A_R} l) + \frac{2\gamma \cos\theta}{r} \right) A_c - 2\pi r \tau_{contact} = 8\mu\pi(l + L_1 + a) \frac{dl}{dt} \quad (0 < l < L_3) \quad (\text{E6})$$

with  $l(t_2)=0$  and  $h_{R_2} = h_{R_0} - 5 \frac{A_c}{A_R} (L_1 + a) - 5 \frac{V_{well}}{A_R}$ . Integrating equation (E6), we have

$$t - t_2 = -\frac{1}{C_4^2} \left[ C_4 L + C_3 \ln \frac{C_3 - C_4(l+L_1+a)}{C_3 - C_4(L_1+a)} \right] \quad (0 < l < L_3, \quad t_2 < t < t_3). \quad (\text{E7})$$

In the above,  $C_3 = \frac{1}{8\mu\pi} \left[ (A_c \rho g h_{R_2}) + \left( 5A_c \rho g \frac{A_c}{A_R} (a + L_1) \right) + \left( A_c \frac{2\gamma \cos\theta}{r} \right) - 2\pi r \tau_{contact} \right]$ ,  $C_4 = \frac{5A_c^2 \rho g}{8\mu\pi A_R}$ , and  $t_3 - t_2 = -\frac{1}{C_4^2} \left[ C_4 L_2 + C_3 \ln \frac{C_3 - C_4(L_1+L_3+a)}{C_3 - C_4(L_1+a)} \right]$ .

Fig. S3 depicts the estimated time as a function of the position of the liquid front. Our experimental data exhibits qualitatively similar behavior, albeit with somewhat slower times, possibly due to the incomplete opening of the phase change valves that restrict the flow.



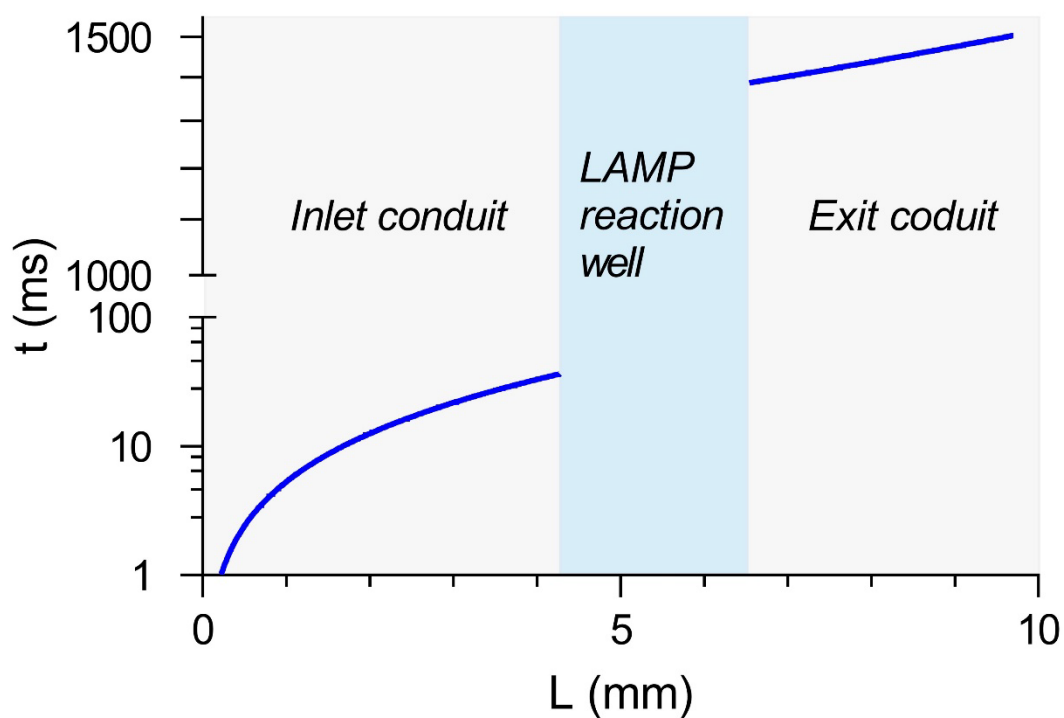

**Fig. S3:** Time as a function of the liquid front's position during self-aliquoting

When the liquid arrives at the capillary valve (component 4 in Fig. 1A), the meniscus pins and the flow halts. The valve bridging pressure was determined by gradually increasing the height ( $h$ ) of a vertical liquid column of phenol red aqueous solution mixed with 0.1% Tween 20 (to mimic the physiochemical properties of our LAMP reaction mix) in the RPA well upstream of the capillary valve

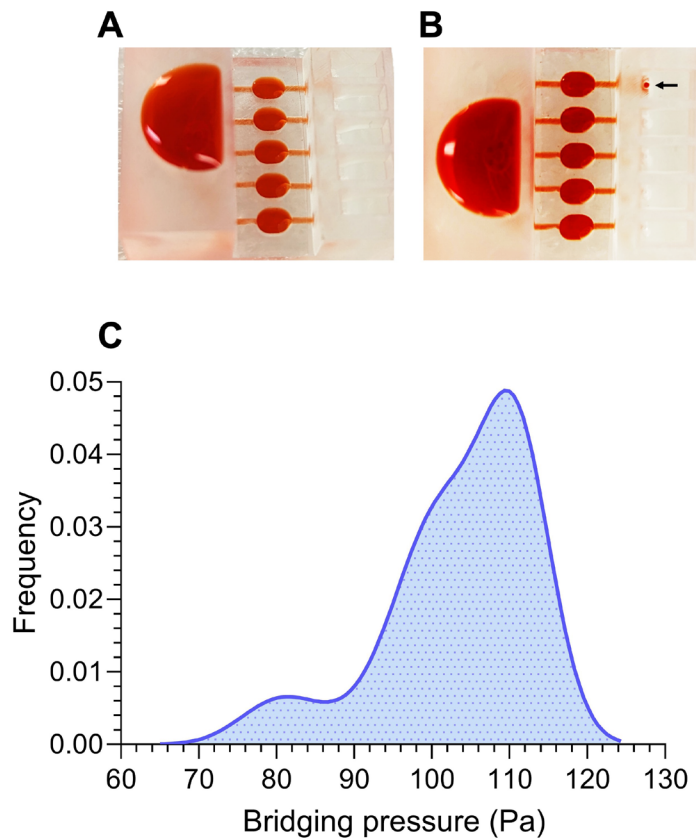

**Fig. S4: Capillarity valve bridging pressure.** When the fluid arrives at the passive valve, the meniscus pins, and the flow halts (**A**). The liquid height ( $h_c$ ) above which the capillary valve broke (**B**) is the capillary valve bridging pressure  $\Delta p_c = \rho g h_c$  when operating with our reaction buffer, which has surface tension smaller than pure water. In the above,  $\rho$  is the liquid density, and  $g$  is the gravitational acceleration. (**C**) Kernel density estimation KDE (approximation of the probability density function, *pdf*) of the capillary valve bridging pressure  $\Delta p_c$ . Bridging pressure was estimated using 24 chiplets ( $N = 24$ ).

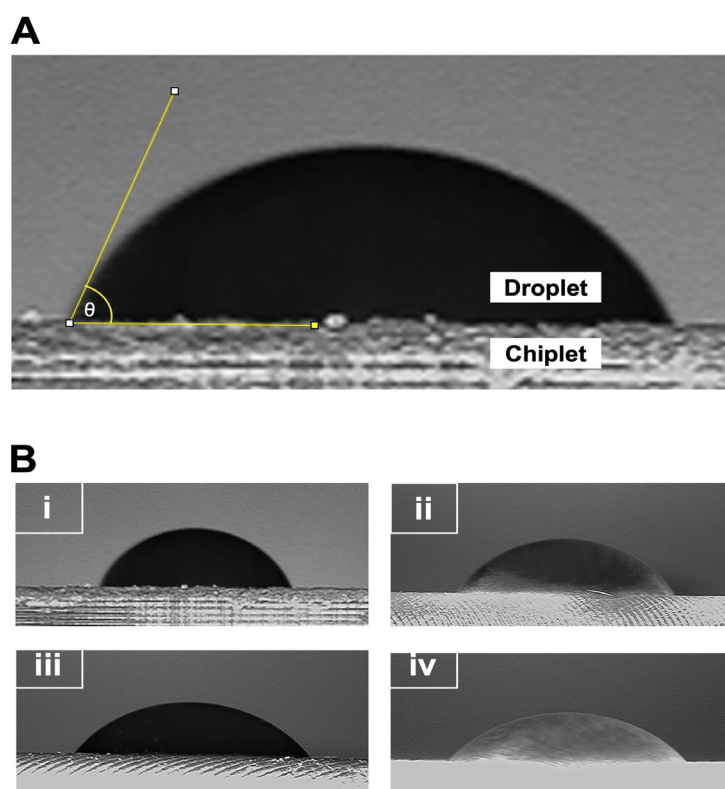

**Fig. S5:** The wettability of chiplet's material. A droplet (5  $\mu$ L) of phenol red solution mixed with 0.1% Tween 20 (a surrogate for the reaction buffer) was placed on a flat surface made with the chiplet's resin. **(A)** Enlarged image showing aqueous droplet on the resin surface and the contact angle ( $\theta$ ). **(B)** The droplet on clear resin (without PEG treatment) (i), clear resin coated with 2% PEG, black resin (without PEG treatment) (iii), and black resin coated with 2% PEG. The contact angles were determined with ImageJ software and the DropSnake plugin [S4]. The predicted values are in close agreement with direct measurements.

| Resin                                 | Coating | Contact angle $\theta$ ( $^{\circ}$ ) |
|---------------------------------------|---------|---------------------------------------|
| <b>Clear</b> (Formlabs RS-F2-GPCL-04) | None    | $67.9 \pm 2.8$                        |
|                                       | PEG     | $58.5 \pm 2.5$                        |
| <b>Black</b> (Formlabs RS-F2-GPBK-04) | None    | $50.2 \pm 2.1$                        |
|                                       | PEG     | $47.6 \pm 0.9$                        |

#Average contact angle ( $\pm$  standard deviation). All measurements were in triplicate.

## SECTION S4: TEMPERATURE DISTRIBUTION

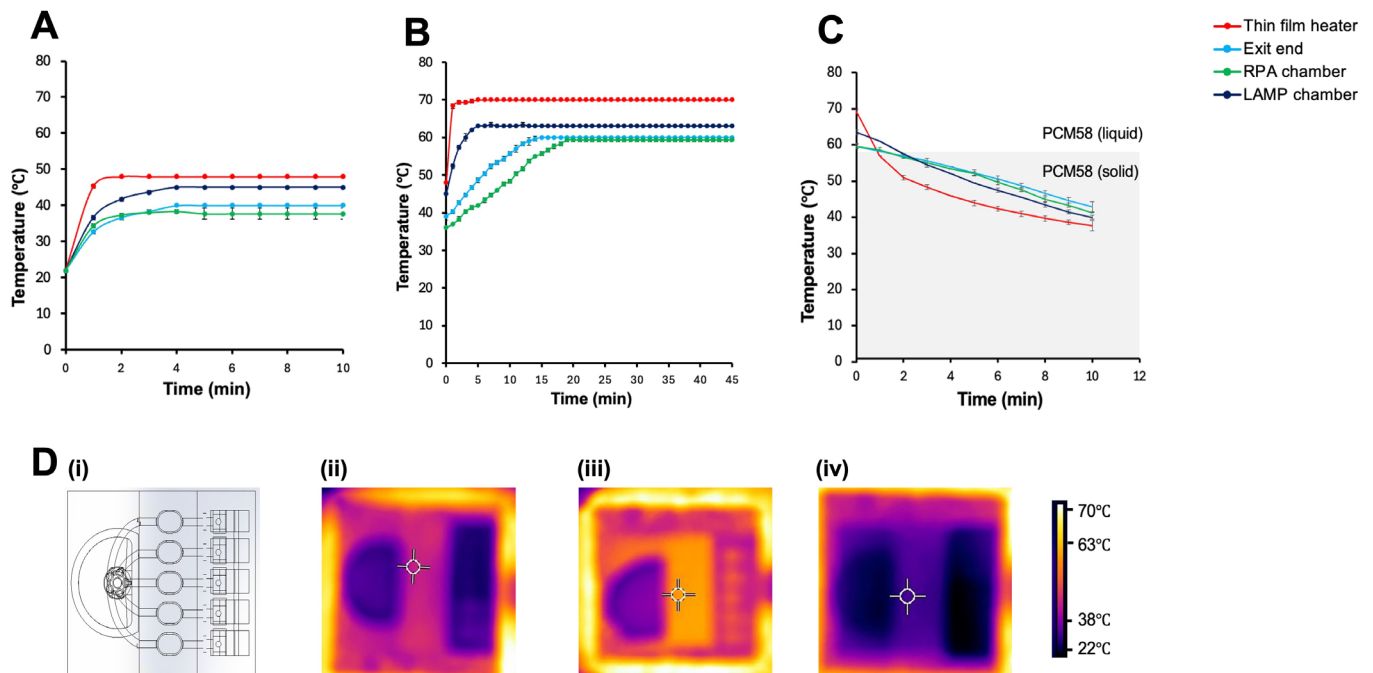

**Fig. S6:** The temperature of the thin film heater, RPA chamber (inlet), LAMP chamber, and the chiplet's distal end as functions of time during 1<sup>st</sup> stage RPA incubation (**A**); 2<sup>nd</sup> stage LAMP reaction (**B**); and after the power was cut off (**C**). (D) (i) A wireframe top view of the chiplet. Infrared, steady-state thermal images (FLIR E8, TELEDYNE FLIR, USA, <https://www.flir.com/support/products/e8/#Overview>) of the chiplet during (ii) 1<sup>st</sup> stage RPA reaction, (iii) 2<sup>nd</sup> stage LAMP reaction – witness temperature uniformity across the LAMP reaction chambers, and (iv) post-RAMP assay. The PCM58 solidifies to seal the inlet and the outlets at <58°C when the heater is turned off after the RAMP assay. Error bars represent the standard deviation for triplicate measurement.

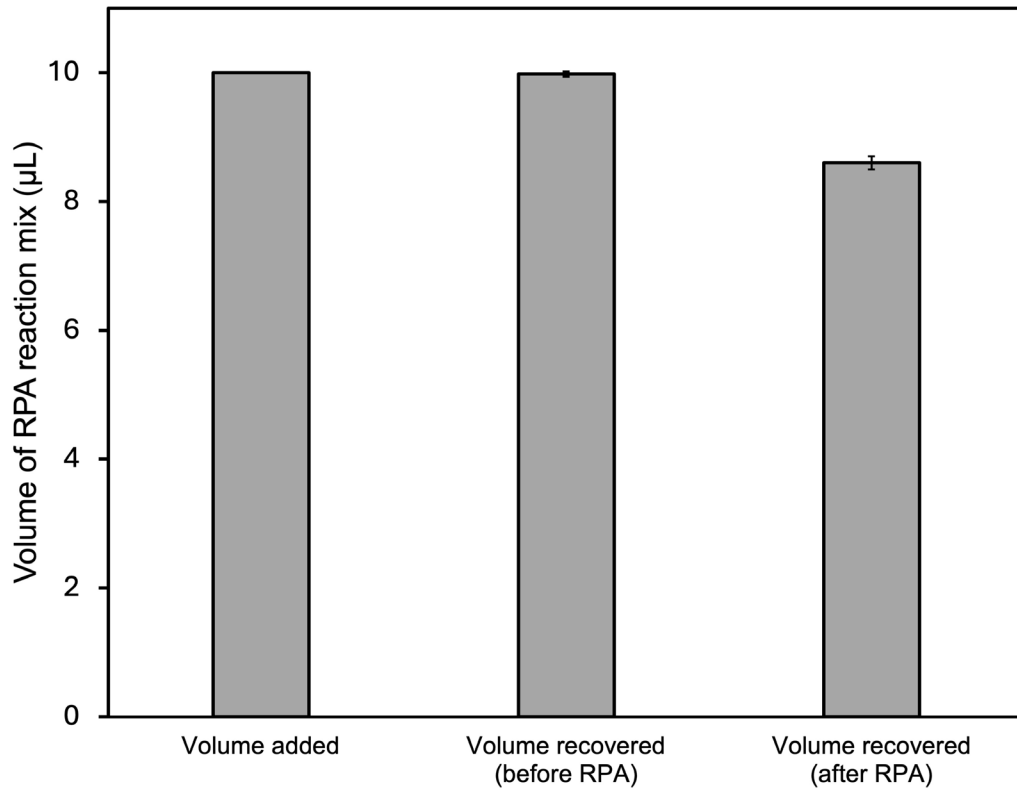

**Fig. S7:** Volume of the RPA reaction mix added and recovered before and after 10 min incubation at 38°C. Error bars represent standard deviation. Experiments were carried out in triplicate.

## SECTION S5: AMPLIFICATION CURVES

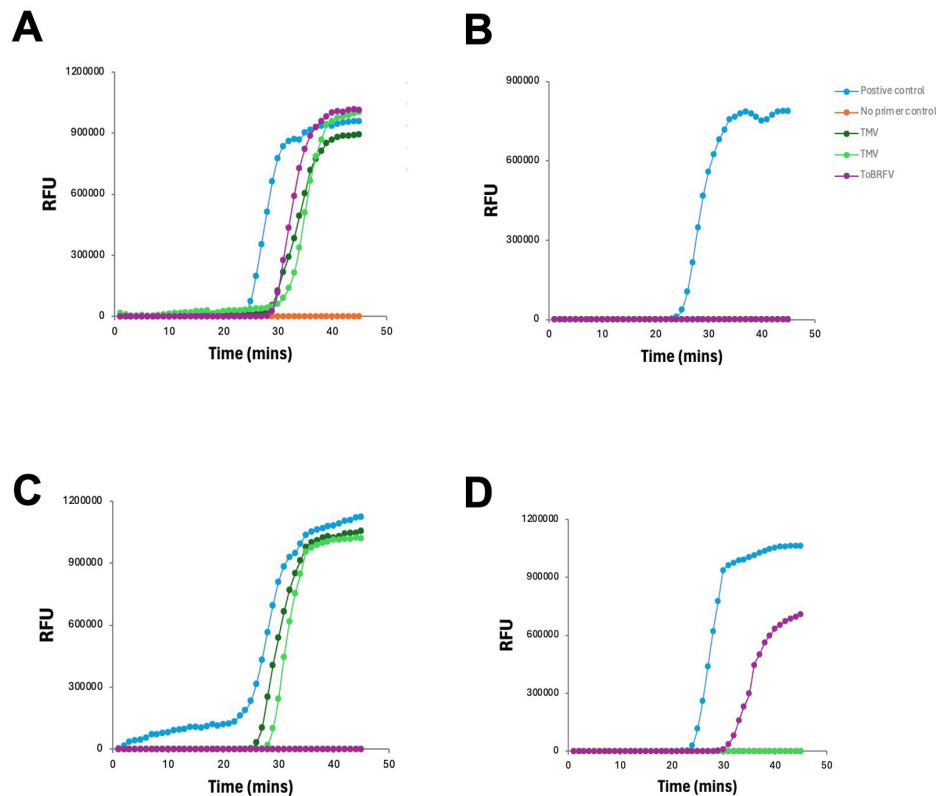

**Fig. S8:** Amplification curves of tomato viruses nucleic acids carried out on the Penn-RAMP chiplet. Second-stage fluorescent images were processed and analyzed with MATLAB to produce average fluorescent intensity in each reaction chamber as a function of time for samples comprised of **(A)** ToBRFV, TMV, and tomato gDNA; **(B)** only tomato gDNA; **(C)** TMV and tomato gDNA; and **(D)** ToBRFV and tomato gDNA.  $10^3$  template copies in each reaction. The chiplet was incubated with our homemade processor (**Fig. S1**).

## References

- [S1] Phenol, <https://cameochemicals.noaa.gov/chris/PHN.pdf>, (accessed August 2024).
- [S2] SIGMA: Tween 20, <https://www.sigmaaldrich.com/deepweb/assets/sigmaaldrich/product/documents/217/731/p5927pis.pdf?srsIid=AfmBOooF0J8CcT0GSiNlyRm-8vLFkuZ8yvIoTJX1LZ8XI32JJHyoBCKj>, (accessed August 2024).
- [S3] É. Ruiz-Gutiérrez, S. Armstrong, S. Lévêque, C. Michel, I. Pagonabarraga, G. G. Wells, A. Hernández-Machado and R. Ledesma-Aguilar, *Journal of Fluid Mechanics*, 2022, **939**, A39.
- [S4] Biomedical Imaging Group, Drop shape analysis, <https://bigwww.epfl.ch/demo/dropanalysis/> (accessed September 2024)
